# Supplementary material for: Drosophila melanogaster Selection for Survival of Bacillus cereus Infection: Life History Trait Indirect Responses
Source: PubMed Central journal article supplement (PMC3474238; doi:10.1155/2012/935970), 2012-10-09
Supplement: 935970.f1.pdf [file 935970.f1.pdf]

S 1a. F values and degrees of freedom from the statistical analysis (mixed model ANOVA) of female and male survival time

| Overall Effects  | Lines/Treatments             | Comparisons            | Num DF of female survival | Den DF of female survival | F value of female survival | Num DF of male survival | Den DF of male survival | F value of male survival |
|------------------|------------------------------|------------------------|---------------------------|---------------------------|----------------------------|-------------------------|-------------------------|--------------------------|
| Lines            |                              |                        | 2                         | 6                         | 0.93                       | 2                       | 6                       | 0.70                     |
| Treatments       |                              |                        | 2                         | 83                        | 10.51                      | 2                       | 84                      | 8.89                     |
| Lines*Treatments |                              |                        | 4                         | 83                        | 2.00                       | 4                       | 84                      | 1.69                     |
|                  | Lines                        |                        |                           |                           |                            |                         |                         |                          |
|                  | No Perturbation Control (CN) | Treatment <sup>a</sup> | 2                         | 83                        | 1.66                       | 2                       | 84                      | 0.40                     |
|                  | Control Punctured (CP)       | Treatment <sup>a</sup> | 2                         | 83                        | 12.58                      | 2                       | 84                      | 6.34                     |
|                  | Selected (S)                 | Treatment <sup>a</sup> | 2                         | 83                        | 0.86                       | 2                       | 84                      | 6.73                     |
|                  | Treatments                   |                        |                           |                           |                            |                         |                         |                          |
|                  | AS                           | Lines <sup>b</sup>     | 2                         | 83                        | 0.36                       | 2                       | 84                      | 1.83                     |
|                  | H <sub>2</sub> O             | Lines <sup>b</sup>     | 2                         | 83                        | 1.60                       | 2                       | 84                      | 1.41                     |
|                  | NON                          | Lines <sup>b</sup>     | 2                         | 83                        | 1.32                       | 2                       | 84                      | 0.12                     |

a. Treatments: punctured with autoclaved spores (AS), punctured with sterile H<sub>2</sub>O and no treatment (NON) ;

b. Line types: selected (S), punctured with H<sub>2</sub>O each generation (CP), no perturbation each generation (CN)

S 1b. F values and degrees of freedom from the statistical analysis (mixed model ANOVA) of egg and progeny production

| Overall Effects  | Lines/Treatments             | Comparisons            | Num DF of egg production | Den DF of egg production | F value of egg production | Num DF of progeny production | Den DF of progeny production | F value of progeny production |
|------------------|------------------------------|------------------------|--------------------------|--------------------------|---------------------------|------------------------------|------------------------------|-------------------------------|
| Lines            |                              |                        | 2                        | 6                        | 7.79                      | 2                            | 6                            | 3.55                          |
| Treatments       |                              |                        | 2                        | 502                      | 5.62                      | 2                            | 477                          | 7.76                          |
| Lines*Treatments |                              |                        | 4                        | 502                      | 2.74                      | 4                            | 477                          | 1.68                          |
|                  | Lines                        |                        |                          |                          |                           |                              |                              |                               |
|                  | No Perturbation Control (CN) | Treatment <sup>a</sup> | 2                        | 502                      | 0.80                      | 2                            | 477                          | 6.21                          |
|                  | Control Punctured (CP)       | Treatment <sup>a</sup> | 2                        | 502                      | 1.12                      | 2                            | 477                          | 1.73                          |
|                  | Selected (S)                 | Treatment <sup>a</sup> | 2                        | 502                      | 9.14                      | 2                            | 477                          | 3.36                          |
|                  | Treatments                   |                        |                          |                          |                           |                              |                              |                               |
|                  | AS                           | Lines <sup>b</sup>     | 2                        | 502                      | 0.40                      | 2                            | 477                          | 3.09                          |
|                  | H <sub>2</sub> O             | Lines <sup>b</sup>     | 2                        | 502                      | 1.76                      | 2                            | 477                          | 3.57                          |
|                  | NON                          | Lines <sup>b</sup>     | 2                        | 502                      | 11.63                     | 2                            | 477                          | 0.04                          |

a. Treatments: punctured with autoclaved spores (AS), punctured with sterile H<sub>2</sub>O and no treatment (NON) ;

b. Line types: selected (S), punctured with H<sub>2</sub>O each generation (CP), no perturbation each generation (CN)

S 1c. F values and degrees of freedom from the statistical analysis (mixed model ANOVA) of progeny development time

| Overall Effects  | Lines/Treatments             | Comparisons            | Num DF of progeny development time | Den DF of progeny development time | F value of progeny development time |
|------------------|------------------------------|------------------------|------------------------------------|------------------------------------|-------------------------------------|
| Lines            |                              |                        | 2                                  | 4                                  | 3.24                                |
| Treatments       |                              |                        | 4                                  | 234                                | 3.81                                |
| Lines*Treatments |                              |                        | 8                                  | 234                                | 1.44                                |
|                  | Lines                        |                        |                                    |                                    |                                     |
|                  | No Perturbation Control (CN) | Treatment <sup>a</sup> | 4                                  | 234                                | 0.41                                |
|                  | Control Punctured (CP)       | Treatment <sup>a</sup> | 4                                  | 234                                | 1.59                                |
|                  | Selected (S)                 | Treatment <sup>a</sup> | 4                                  | 234                                | 4.69                                |
|                  | Treatments                   |                        |                                    |                                    |                                     |
|                  | A <sup>a</sup>               | Lines <sup>b</sup>     | 2                                  | 234                                | 4.83                                |
|                  | B <sup>a</sup>               | Lines <sup>b</sup>     | 2                                  | 234                                | 0.15                                |
|                  | C <sup>a</sup>               | Lines <sup>b</sup>     | 2                                  | 234                                | 1.01                                |
|                  | D <sup>a</sup>               | Lines <sup>b</sup>     | 2                                  | 234                                | 0.72                                |
|                  | E <sup>a</sup>               | Lines <sup>b</sup>     | 2                                  | 234                                | 4.72                                |

a. females punctured with autoclaved spores and mated with untreated males (A), males punctured with autoclaved spores and mated with untreated females (B), females punctured with sterile water and mated with untreated males (C), males punctured with sterile water and mated with untreated females (D), and untreated females mated with untreated males (E)

b. line types: selected (S), punctured with H<sub>2</sub>O each generation (CP), no perturbation each generation (CN)

S2

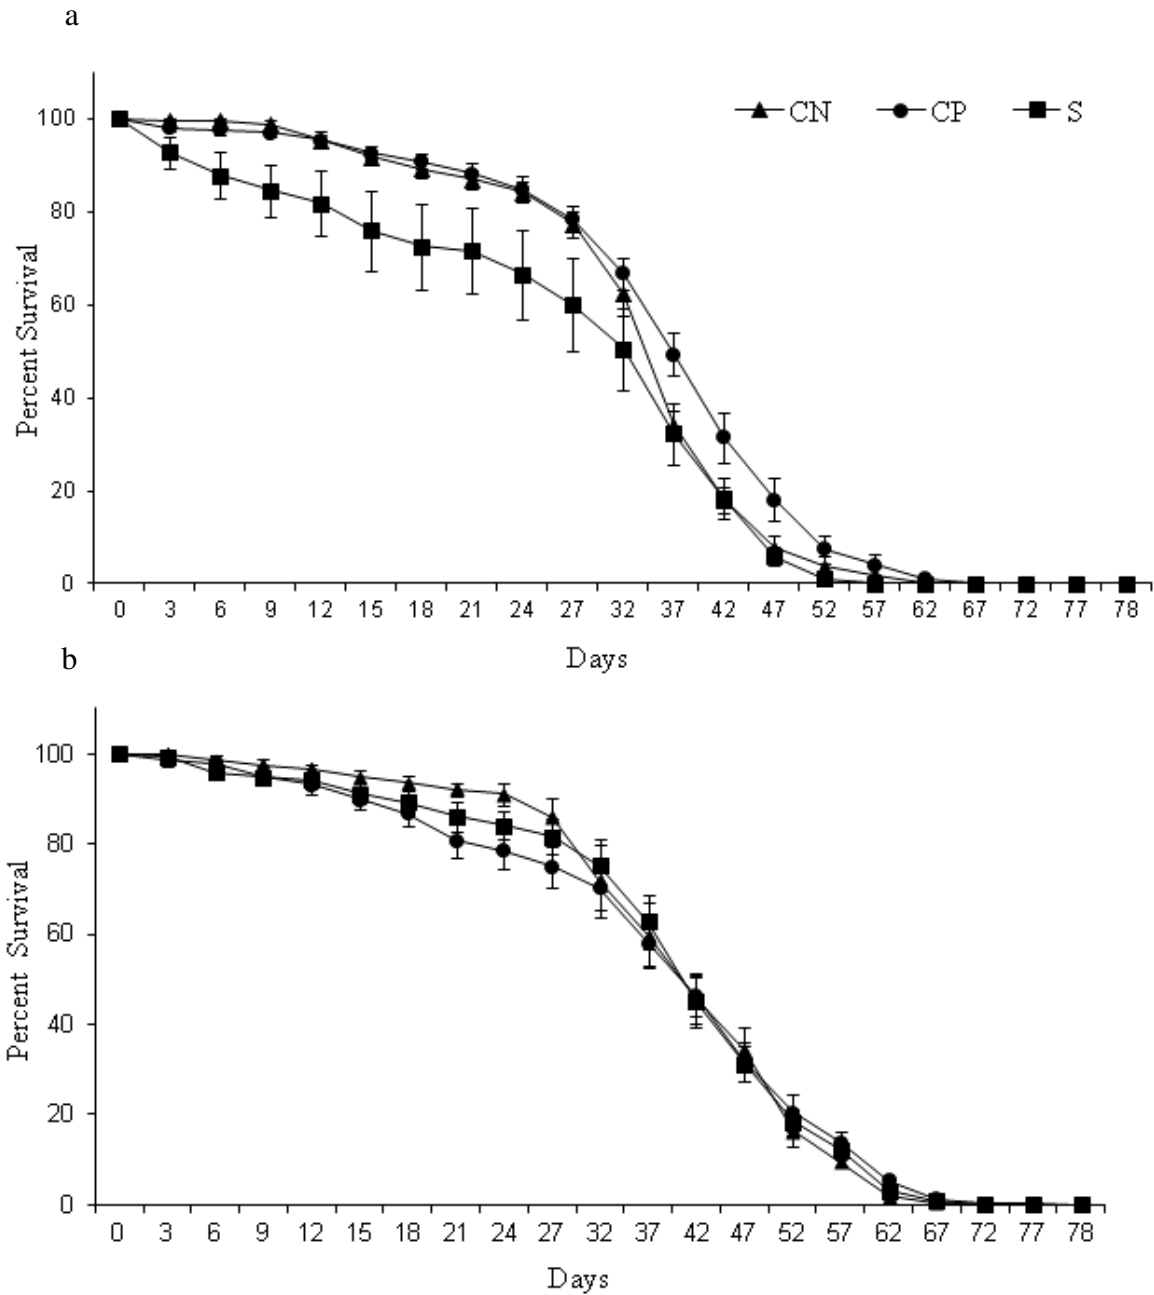

a: Average percentage survival of untreated adult females from the selected and control lines. The mean was determined from the replicate lines of the same type: S-selected lines, CP-lines punctured with H<sub>2</sub>O (wound control), CN-no perturbation lines.

b: Average percentage survival of untreated adult males from the selected and control lines. The mean was determined from the replicate lines of the same type: S-selected lines, CP-lines punctured with H<sub>2</sub>O (wound control), CN-no perturbation lines.
